# Supplementary material for: Resistome Analysis of Klebsiella pneumoniae Complex from Residential Aged Care Facilities Demonstrates Intra-facility Clonal Spread of Multidrug-Resistant Isolates
Source: MDPI journal article supplement (doi:10.3390/microorganisms12040751), 2024-04-08
Supplement: s1 [file s1]

**Supplementary Table S3:** Matrix of SNP pair counts for ST661 isolates, with A922 used as a reference.

| Sample Information |           |             |                 | SNP matrix |      |      |      |      |      |
|--------------------|-----------|-------------|-----------------|------------|------|------|------|------|------|
| Location           | Sample ID | Sample type | Collection date |            | A922 | 2410 | 2418 | A095 | A529 |
| Facility 1         | N/A       | Wastewater  | 02/12/2019      | A922       | 0    | 22   | 29   | 26   | 34   |
| Facility 1         | 50        | Faecal      | 04/12/2019      | 2410       | 22   | 0    | 15   | 32   | 24   |
| Facility 1         | 50        | Faecal      | 04/12/2019      | 2418       | 29   | 15   | 0    | 33   | 35   |
| Facility 1         | 50B       | Faecal      | 14/07/2020      | A095       | 26   | 32   | 33   | 0    | 40   |
| Facility 1         | 70        | Room Swab   | 20/10/2020      | A529       | 34   | 24   | 35   | 40   | 0    |
