# Supplementary material for: Resistome Analysis of Klebsiella pneumoniae Complex from Residential Aged Care Facilities Demonstrates Intra-facility Clonal Spread of Multidrug-Resistant Isolates
Source: MDPI journal article supplement (doi:10.3390/microorganisms12040751), 2024-04-08
Supplement: s1 [file s1]

**Supplementary Table S1:** Mutations in genes known to confer antimicrobial resistance, with isolate A031 as reference.

|             | A031                                                   | A026  | A095           | A529           | A629  | A413  | A409  | 2401  | 2404  | 2410           | 2418           | A922           | 2362  |
|-------------|--------------------------------------------------------|-------|----------------|----------------|-------|-------|-------|-------|-------|----------------|----------------|----------------|-------|
|             | Ciprofloxacin phenotype R (resistant) or S (sensitive) |       |                |                |       |       |       |       |       |                |                |                |       |
|             | R                                                      | R     | R              | R              | R     | R     | R     | R     | R     | R              | R              | R              | R     |
| <b>GyrA</b> | X                                                      | X     | X              | X              | X     | X     | X     | X     | X     | X              | X              | X              | X     |
| <b>GyrB</b> | X                                                      | X     | X              | X              | X     | X     | X     | X     | X     | X              | X              | X              | X     |
| <b>ParC</b> | X                                                      | N304S | X              | X              | N304S | N304S | N304S | N304S | X     | X              | X              | X              | N304S |
| <b>ParE</b> | X                                                      | X     | X              | X              | X     | X     | X     | X     | X     | X              | X              | X              | X     |
|             | Colistin phenotype R (resistant) or S (sensitive)      |       |                |                |       |       |       |       |       |                |                |                |       |
|             | S                                                      | S     | S              | S              | S     | S     | S     | S     | S     | R              | S              | S              | S     |
| <b>PhoP</b> | X                                                      | X     | X              | X              | X     | X     | X     | X     | X     | X              | X              | X              | X     |
| <b>PhoQ</b> | X                                                      | X     | X              | X              | X     | X     | X     | X     | X     | X              | X              | X              | X     |
| <b>PmrA</b> | M66I                                                   | X     | M66I           | M66I           | X     | X     | X     | X     | X     | M66I           | M66I           | M66I           | X     |
| <b>PmrB</b> | X                                                      | T246A | T240M<br>T246A | T240M<br>T246A | T246A | T246A | T246A | T246A | T246A | T240M<br>T246A | T240M<br>T246A | T240M<br>T246A | T246A |
| <b>EptA</b> | T149M<br>T224M<br>K399I                                | X     | T224M          | T224M          | X     | X     | X     | X     | X     | T224M          | T224M          | T224M          | X     |
| <b>EptB</b> | X                                                      | X     | X              | X              | X     | X     | X     | X     | X     | X              | X              | X              | X     |
| <b>MgrB</b> | X                                                      | X     | X              | X              | X     | X     | X     | X     | X     | X              | X              | X              | X     |
|             | Ceftazidime phenotype R (resistant) or S (sensitive)   |       |                |                |       |       |       |       |       |                |                |                |       |
|             | R                                                      | R     | R              | R              | R     | R     | R     | R     | R     | R              | R              | S              | R     |
|             | Cefepime phenotype R (resistant) or S (sensitive)      |       |                |                |       |       |       |       |       |                |                |                |       |
|             | S                                                      | S     | R              | S              | S     | S     | R     | S     | S     | R              | R              | S              | S     |

|               |   |       |                                                                                                                                         |                                                                                                                                         |       |       |       |                                                                                                                                         |       |                                                                                                                                         |                                                                                                                                         |                                                                                                                                         |       |
|---------------|---|-------|-----------------------------------------------------------------------------------------------------------------------------------------|-----------------------------------------------------------------------------------------------------------------------------------------|-------|-------|-------|-----------------------------------------------------------------------------------------------------------------------------------------|-------|-----------------------------------------------------------------------------------------------------------------------------------------|-----------------------------------------------------------------------------------------------------------------------------------------|-----------------------------------------------------------------------------------------------------------------------------------------|-------|
| <b>OmpK35</b> | x | K132E | K132E                                                                                                                                   | K132E                                                                                                                                   | K132E | K132E | K132E | K132E                                                                                                                                   | K132E | K132E                                                                                                                                   | K132E                                                                                                                                   | K132E                                                                                                                                   | K132E |
| <b>OmpK36</b> | x | x     | L184INS<br>G191T<br>F200Y<br>H220N<br>N204L<br>S228INS<br>R229K<br>D231A<br>K232L<br>I312L<br>L320I<br>E349D<br>D351S<br>R355H<br>R356N | L184INS<br>G191T<br>F200Y<br>H220N<br>N204L<br>S228INS<br>R229K<br>D231A<br>K232L<br>I312L<br>L320I<br>E349D<br>D351S<br>R355H<br>R356N | x     | x     | x     | L184INS<br>G191T<br>F200Y<br>H220N<br>N204L<br>S228INS<br>R229K<br>D231A<br>K232L<br>I312L<br>L320I<br>E349D<br>D351S<br>R355H<br>R356N | x     | L184INS<br>G191T<br>F200Y<br>H220N<br>N204L<br>S228INS<br>R229K<br>D231A<br>K232L<br>I312L<br>L320I<br>E349D<br>D351S<br>R355H<br>R356N | L184INS<br>G191T<br>F200Y<br>H220N<br>N204L<br>S228INS<br>R229K<br>D231A<br>K232L<br>I312L<br>L320I<br>E349D<br>D351S<br>R355H<br>R356N | L184INS<br>G191T<br>F200Y<br>H220N<br>N204L<br>S228INS<br>R229K<br>D231A<br>K232L<br>I312L<br>L320I<br>E349D<br>D351S<br>R355H<br>R356N | x     |
| <b>OmpK37</b> | x | I184M | X                                                                                                                                       | X                                                                                                                                       | I184M | I184M | I184M | X                                                                                                                                       | I184M | X                                                                                                                                       | X                                                                                                                                       | X                                                                                                                                       | I184M |
