# Supplementary material for: Resistome Analysis of Klebsiella pneumoniae Complex from Residential Aged Care Facilities Demonstrates Intra-facility Clonal Spread of Multidrug-Resistant Isolates
Source: MDPI journal article supplement (doi:10.3390/microorganisms12040751), 2024-04-08
Supplement: s1 [file s1]

**Supplementary Table S2:** Matrix of SNP pair counts for ST323 isolates, with A409 used as reference.

| Sample Information |           |             |                 | SNP Matrix |      |      |      |      |      |      |
|--------------------|-----------|-------------|-----------------|------------|------|------|------|------|------|------|
| Location           | Sample ID | Sample type | Collection date |            | 2362 | A409 | A413 | A629 | 2401 | 2404 |
| Facility 1         | N/A       | Wastewater  | 02/12/2019      | 2362       | 0    | 40   | 28   | 35   | 22   | 24   |
| Facility 1         | 60        | Sink        | 30/09/2020      | A409       | 40   | 0    | 24   | 41   | 24   | 24   |
| Facility 1         | 60        | Sink        | 30/09/2020      | A413       | 28   | 24   | 0    | 33   | 14   | 16   |
| Facility 1         | 77B       | Faecal      | 09/12/2020      | A629       | 35   | 41   | 33   | 0    | 23   | 25   |
| Facility 1         | 60        | Faecal      | 24/01/2020      | 2401       | 22   | 24   | 14   | 23   | 0    | 8    |
| Facility 1         | 61        | Faecal      | 17/01/2019      | 2404       | 24   | 24   | 16   | 25   | 8    | 0    |
